# Supplementary material
Source: PubMed Central journal article supplement (PMC8139435)

**Supplementary Figure S1.** Map of the amino acid changes along the SARS-CoV-2 genome.

The genome contains 36 nucleotide substitutions and 13 nucleotide deletions. They correspond to 29 amino acid substitutions and 4 amino acid deletions. Eight amino acid substitutions and 2 amino acid deletions are located in the spike protein, all in its S1 domain. Four substitutions (T19R, A67V, T95I, E156G) and the two deletions (F157-, R158-) are in the N-terminal domain, two substitutions (L452R, T478K) are in the receptor binding motif. Five amino acid substitutions are located in regulatory factors and two amino acid (D119-, F120-) are deleted from ORF8-encoded protein. Five substitutions are in the structural proteins. Other mutations include 3 in NSP3 (protease), 2 in NSP12 (RNA-dependent RNA polymerase), 1 in NSP13 (helicase) and 1 in nuclease (NSP14).

### SARS-CoV-2 genome

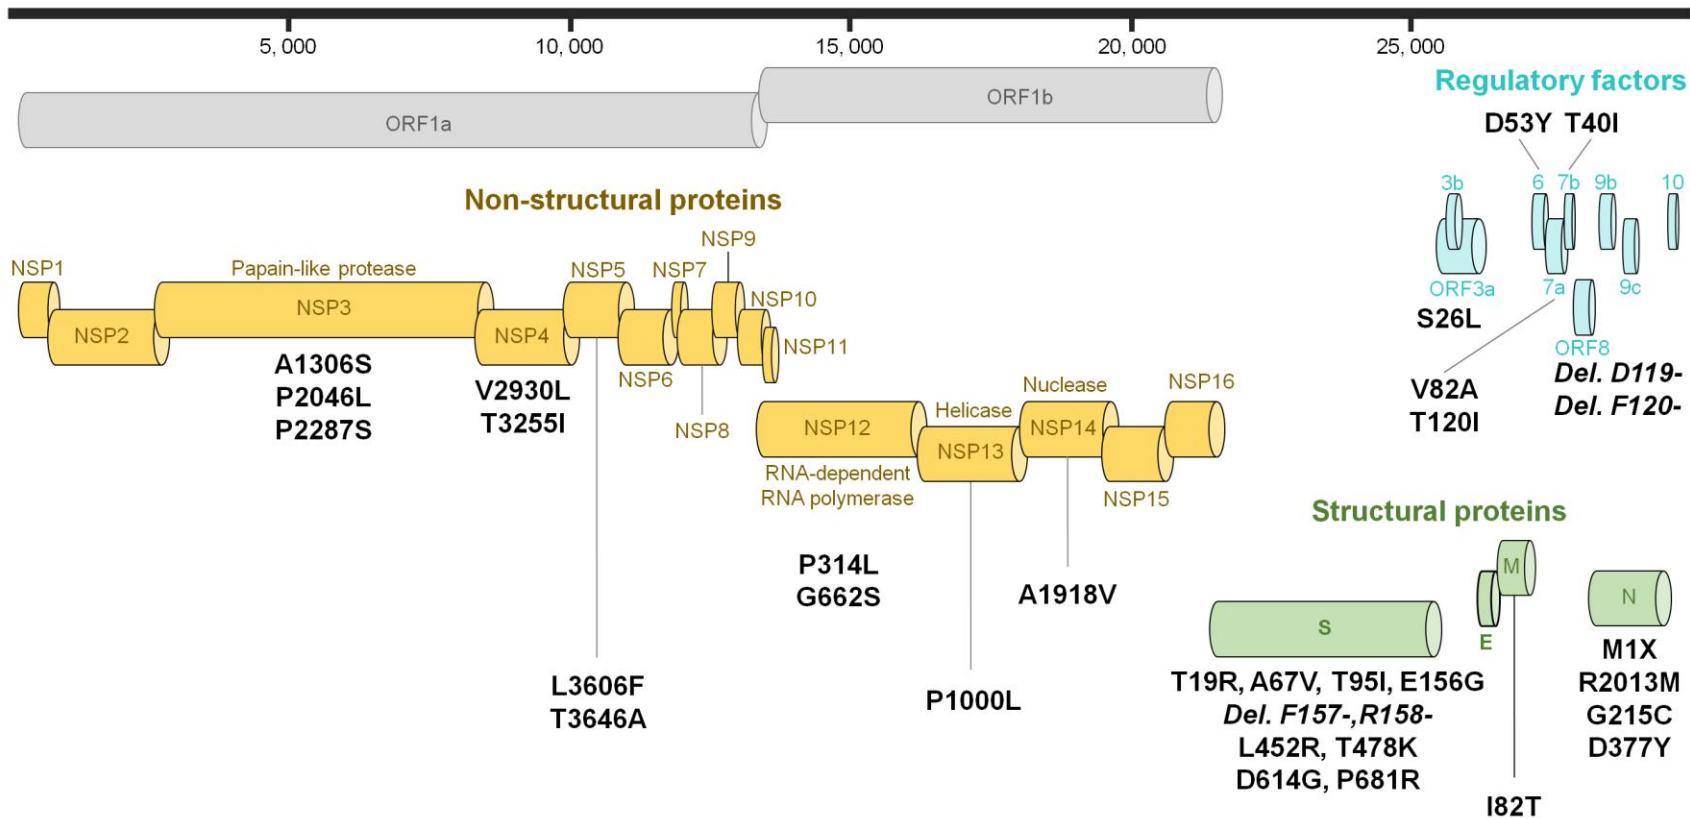

**Supplementary Figure S2.** Indian variant isolated in Marseille at IHU Méditerranée Infection. Cytopathic effect observed on Vero E6 cells after 24 hours of incubation.

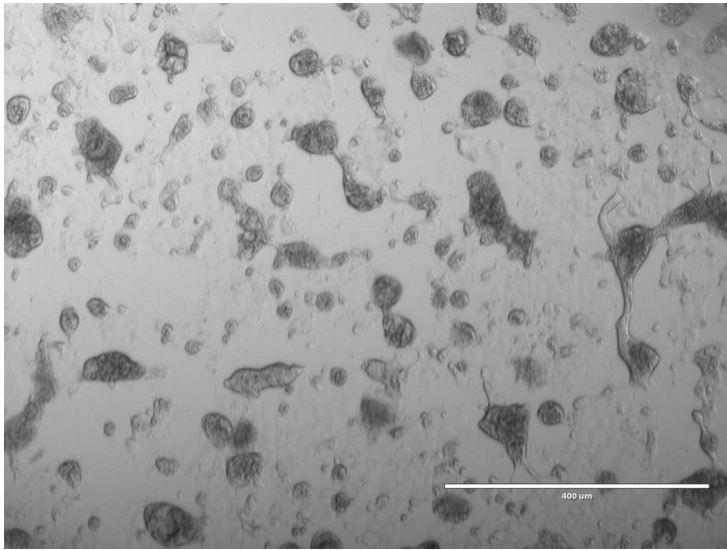

Supplement: mmc1.pdf [file mmc1.pdf]
